# Supplementary material for: The Role of Angiotensin II and Cyclic AMP in Alveolar Active Sodium Transport
Source: PLoS One. 2015 Jul 31;10(7):e0134175. doi: 10.1371/journal.pone.0134175 (PMC4521808; doi:10.1371/journal.pone.0134175)
Supplement: S1 Table — DOI: 10.6084/m9.figshare.1428529. (XLSX) [file pone.0134175.s003.xlsx]

## Sheet: Sheet1
	CT		AngII 10(-6)M		AngII 10(-7)M		AngII 10(-8)		AngII 10(-9)		AngII 10(-10)
	%AFC	FITC	%AFC	FITC	%AFC	FITC	%AFC	FITC	%AFC	FITC	%AFC	FITC
	9.31207	0	5.81721	0.00176565	4.57233	0	4.47735	0.0124929	6.30842	0.013519	6.29603	0.0459563
	9.76871	0.0160274	5.90532	0.0193283	3.63998	0.0225296	4.52543	0	5.95288	0.00775484	6.92959	0.00440846
	8.00547	0.0423	4.59677	0.0370746	4.43997	0.00688456	4.7377	0.00934903	6.32704	0.00189369	6.7436	0.00045489
	8.18993	0.0427481	5.98885	0.0135449	5.05502	0.204564	5.26597	0.0273831	6.50862	0.131198	6.69082	0.00205622
	8.25253	0.00136062	5.32541	0.00831723			6.17083	0	5.82334	0.00215195
	8.40405	0.001	5.40135	0.0192953					6.05619	-0.00232199
	8.94701	0.001	5.54155	0.016487					5.64608	0.00449107
	8.19084	0.001	6.21757	0.0187838					6.59341	0.00113257
	8.53535	0.001	4.999	0.028879
			3.59714	0.0288
			4.44516	0.0035
Average	8.62288	0.0118262	5.25776	0.0177978	4.42683	0.0584945	5.03546	0.009845	6.152	0.0199773	6.66501	0.0132187
STDV	0.595922	0.0180993	0.788392	0.0109185	0.587397	0.0978347	0.707547	0.0112771	0.335927	0.0451949	0.266452	0.0218852
SEM	0.198641	0.0060331	0.237709	0.00329205	0.293698	0.0489173	0.316424	0.00504326	0.118768	0.0159788	0.133226	0.0109426
