# Supplementary material for: The Role of Angiotensin II and Cyclic AMP in Alveolar Active Sodium Transport
Source: PLoS One. 2015 Jul 31;10(7):e0134175. doi: 10.1371/journal.pone.0134175 (PMC4521808; doi:10.1371/journal.pone.0134175)
Supplement: S3 Table — DOI: 10.6084/m9.figshare.1428532. (XLSX) [file pone.0134175.s005.xlsx]

## Sheet: Sheet1
	cAMP
	control	AngII(10-7M)
	16.8131	15.4368
	17.5178	16.3304
	19.952	15.0445
	13.7147	12.519
	20.7102	15.2494
average	17.7416	14.916
STDEV	2.77608	1.42695
SEM	1.2415	0.638153
